# Supplementary material for: SARS-CoV-2 Delta (B.1.617.2) variant replicates and induces syncytia formation in human induced pluripotent stem cell-derived macrophages
Source: PeerJ journal article supplement (doi:10.7717/peerj.14918), 2023-03-02
Supplement: Figure_S1.pdf [file Figure_S1.pdf]

**Delta**

**Omicron**

**Mock**

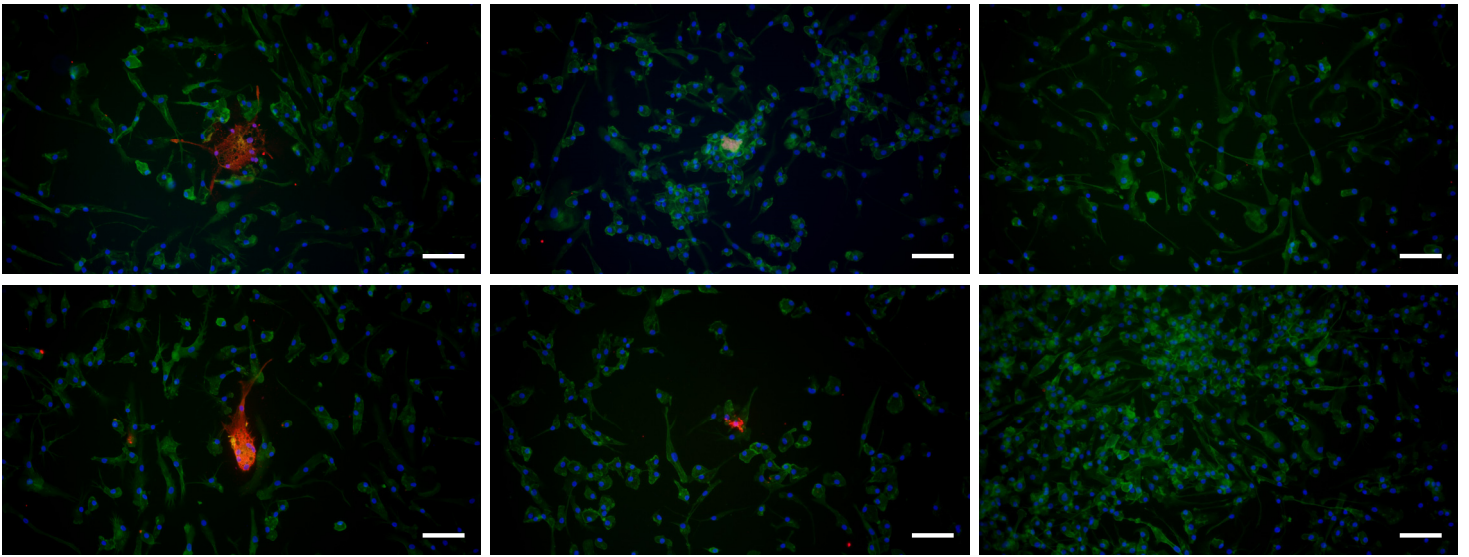

**Figure S1: Delta and Omicron variants infect iMΦ.**
