# Supplementary material for: SARS-CoV-2 Delta (B.1.617.2) variant replicates and induces syncytia formation in human induced pluripotent stem cell-derived macrophages
Source: PeerJ journal article supplement (doi:10.7717/peerj.14918), 2023-03-02
Supplement: Figure_S2.pdf [file Figure_S2.pdf]

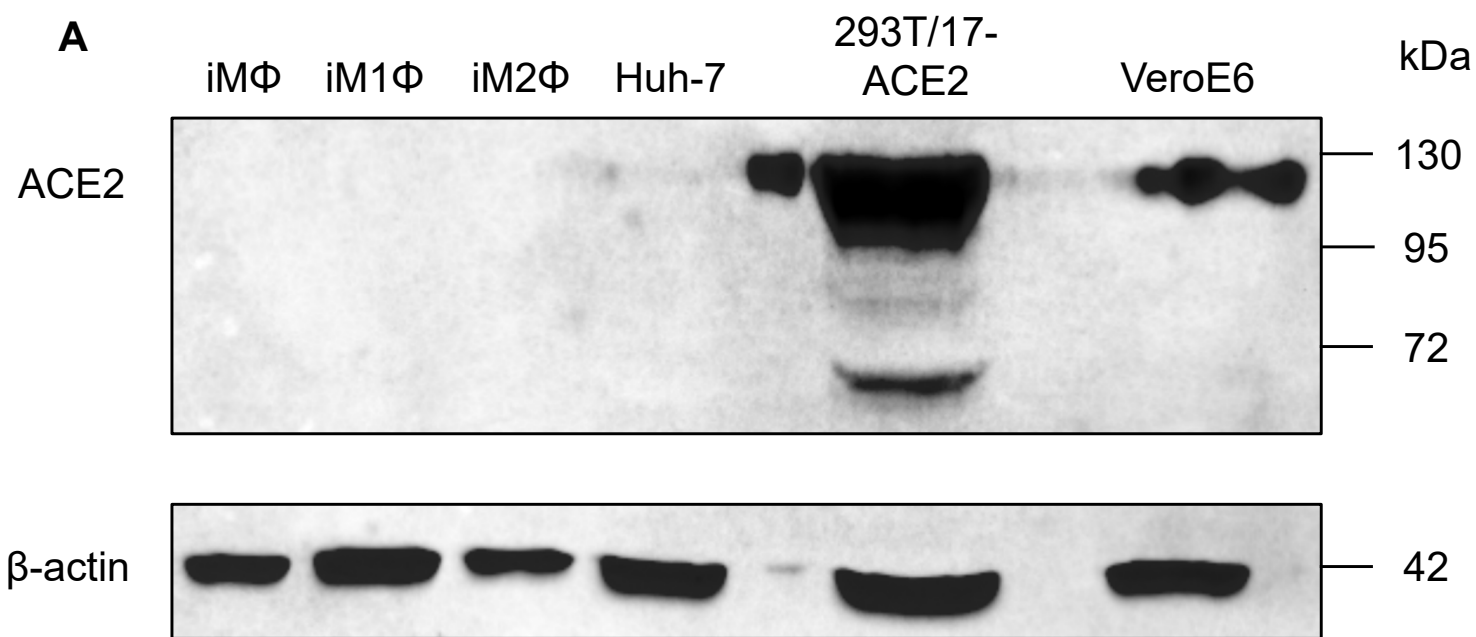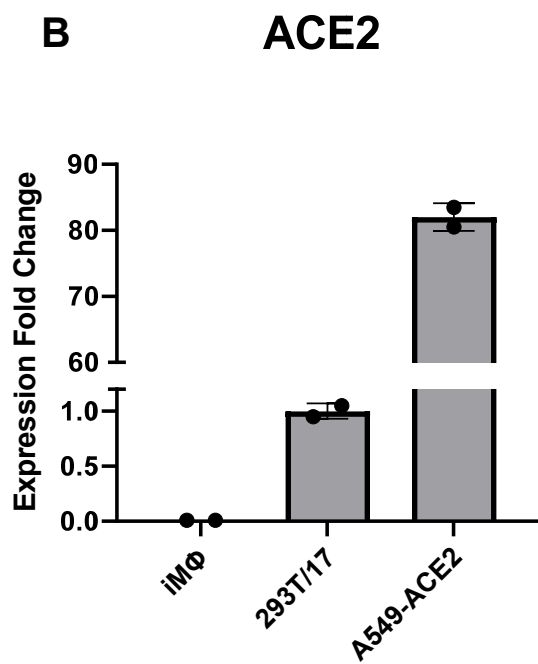

**Figure S2: iM $\Phi$  have undetectable expression of ACE2.**
