# Supplementary material for: SARS-CoV-2 Delta (B.1.617.2) variant replicates and induces syncytia formation in human induced pluripotent stem cell-derived macrophages
Source: PeerJ journal article supplement (doi:10.7717/peerj.14918), 2023-03-02
Supplement: Figure_S3.pdf [file Figure_S3.pdf]

**Mock**

**SARS-CoV-2**

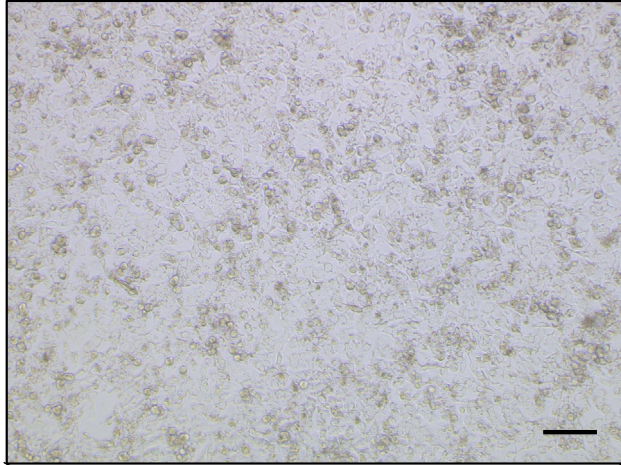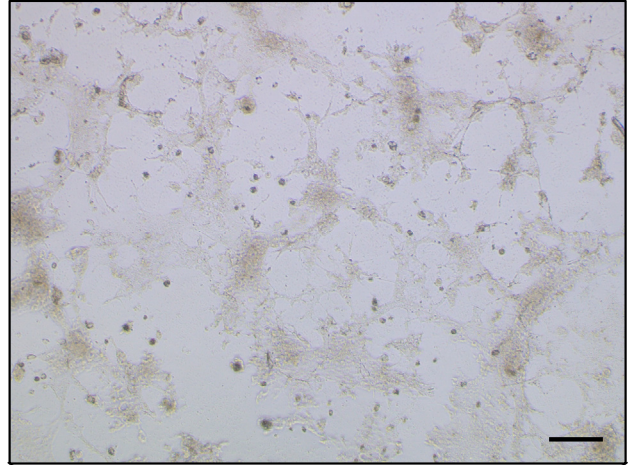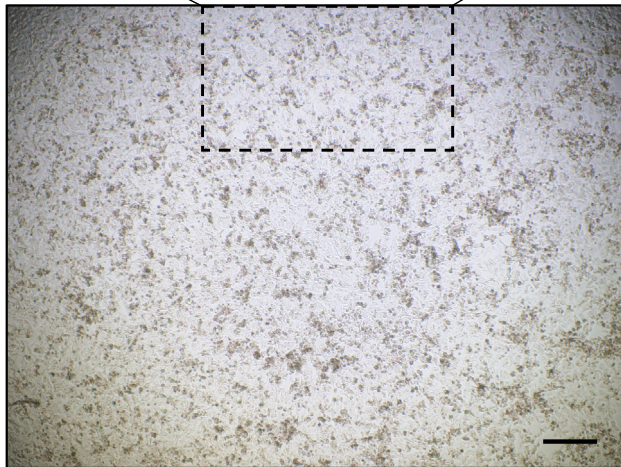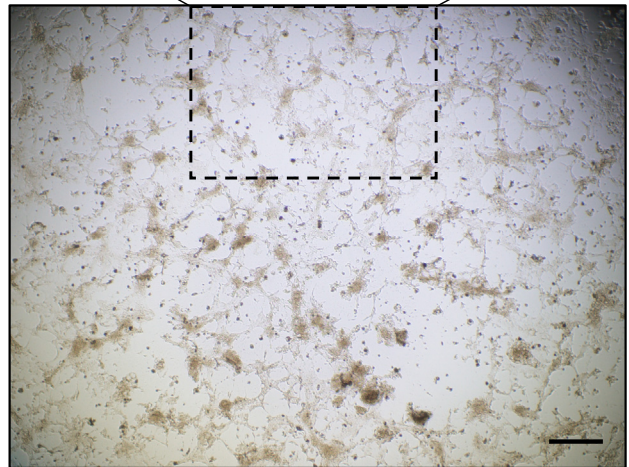

**Figure S3: A549-ACE2 cells show cytopathic effects after SARS-CoV-2 infection.**
