# Supplementary material for: SARS-CoV-2 Delta (B.1.617.2) variant replicates and induces syncytia formation in human induced pluripotent stem cell-derived macrophages
Source: PeerJ journal article supplement (doi:10.7717/peerj.14918), 2023-03-02
Supplement: Figure_S4.pdf [file Figure_S4.pdf]

## CD86

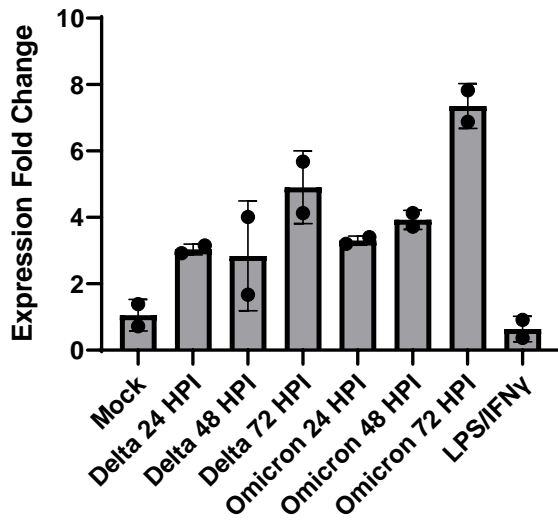

**Figure S4: SARS-CoV-2 infection of iMΦ activates their CD86 gene expression.**
