# Supplementary material for: SARS-CoV-2 Delta (B.1.617.2) variant replicates and induces syncytia formation in human induced pluripotent stem cell-derived macrophages
Source: PeerJ journal article supplement (doi:10.7717/peerj.14918), 2023-03-02

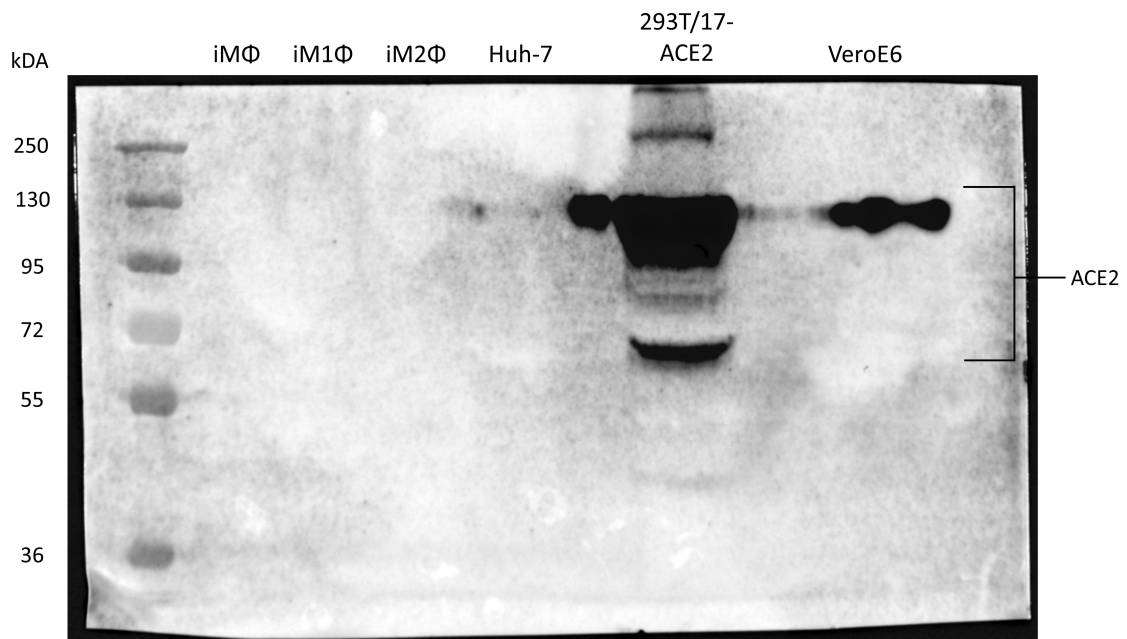

Supplement: Original_blot_of_ACE2_only_for_Fig._S2A.pdf [file Original_blot_of_ACE2_only_for_Fig._S2A.pdf]
